# Supplementary material for: Knockdown of Sly-miR164a Enhanced Plant Salt Tolerance and Improved Preharvest and Postharvest Fruit Nutrition of Tomato
Source: MDPI journal article supplement (doi:10.3390/ijms24054639), 2023-02-27
Supplement: s1 [file s1]

## Supplementary File S2

The sequences of pri-miR164a. Yellow shades indicate the precursor sequence of miR164a. Green shades and bold indicate the miR164a stem-loop sequence and the mature miR164a sequences, respectively.

>pri-miR164a

CTACCACATCCTCACATCTTTTCCAGCTATAAATACTTGAGCTACCCCAATC  
TTCTTATTTGTCACCTCAAGTTCAAAAATGAACAATTCCTCACACAATGCA  
AGAAAATACCTTTTTTCTTTTTTTTAAAGTTGTAGTTAACTTTAATGGAAATGT  
TGGCAATAATGGGTGGGTAACTCATGT**TGGAGAAGCAGGGCACGTGCAA**  
**ATTCTTGTATTCGACAATATATGCATTACTAATGGTAATGCATGAATTTTGCA**  
**CGTGTTCTCCTTCTCCAAC**CCGAATTCCTACCTCCTCTTCTCAAGATTCT  
TCAAAATTCAAACCACTTTTGACCTAATGTGCCTTGAGACGTAATTGTTGTA  
CATTACTTTTTTAAAGTATACGCTATAATACCAAGGAAACATTAACGACTAA  
ACTAATGGCATGCATGACTATGCCCTTGACTAAA
