# Supplementary material for: Knockdown of Sly-miR164a Enhanced Plant Salt Tolerance and Improved Preharvest and Postharvest Fruit Nutrition of Tomato
Source: MDPI journal article supplement (doi:10.3390/ijms24054639), 2023-02-27
Supplement: s1 [file s1]

## Supplementary Table S1

**Table S1.** List of primers sequences.

| Gene and miRNA  | primer         | Sequence (5'-3')               |
|-----------------|----------------|--------------------------------|
| <i>SINAC1</i>   | Forward Primer | CGACCAAACAAACCCTAACAAC         |
|                 | Reverse Primer | TGGTTAGGGGTGAAAATGGAG          |
| <i>SINAC100</i> | Forward Primer | ACTGCTACTGCTTCGAAATCCA         |
|                 | Reverse Primer | TGAATGGAGCTATTTGGTTACAAGA      |
| <i>GOB</i>      | Forward Primer | TCGATTCCTCTCCGTATAGCAC         |
|                 | Reverse Primer | GTCGAAGACAGAAGTTGGATCG         |
| RT-miR164a      | Forward Primer | GTCGTATCCAGTGCAGGGTC           |
|                 | Reverse Primer | CGAGGTATTCGCACTGGATACGACTGCACG |
| Sly-miR164a     | Forward Primer | GCGGCGGTGGAGAAGCAGGGCA         |
|                 | Reverse Primer | GTGCAGGGTCCGAGGT               |
| <i>TOM-U6</i>   | Forward Primer | TCTAACAGTGTAGTTTGTCCCTTCG      |
|                 | Reverse Primer | TTGTGCGTGTTCATCCTTGC           |
| <i>SlActin</i>  | Forward Primer | ATCCACGAGACTACCTACA            |
|                 | Reverse Primer | CTCATACGGTCAGCAATA             |
