# Supplementary material for: Knockdown of Sly-miR164a Enhanced Plant Salt Tolerance and Improved Preharvest and Postharvest Fruit Nutrition of Tomato
Source: MDPI journal article supplement (doi:10.3390/ijms24054639), 2023-02-27
Supplement: s1 [file s1]

## Supplementary File S1

The sequences of STTM 164a. Yellow shades indicate the 48 nt spacer. Green shades indicate the STTM 164a sequences. Blue shades and Bold indicate the *BsaI* and *Eco3II* enzyme digestion sites, respectively. Blue shades indicate the 2 ×35PS and T35PS, respectively.

>STTM 164a

CTTCAAAGCAAGTGGATTGATGTGATATCTCCACTGACGTAAGGGATGACG  
CACAATCCCCTATCCTTCGCAAGACCCTTCCTCTATATAAGGAAGTTCATT  
TCATTGGAGAGAACACGGGGGACTTTGAGGCAAC**TGCACGTGCCCCCTAT**  
**GCTTCTCCA**GTTGTTGTTGTTATGGTCTAATTTAAATATGGTCTAAAGAAGA  
AGAAT**TGCACGTGCCCCCTATGCTTCTCCA**TGTA**ACTAGCTCTGTCTTCAGTA**  
CTGGGCCCCGAAGACTGACCAGCTCGAATTCCCGATCGTCAAACATTGCAA  
TAAGTA
